# Supplementary material
Source: publisher figshare collection journal article supplement (https://acs.figshare.com/ndownloader/files/10219203)
Supplement: Supplementary file 1 [file 10219203]

# Supporting Information

Characterization and photodegradation of polybrominated diphenyl ethers  
(PBDEs) in car seat fabrics from end-of-life vehicles

Amina Khaled<sup>1</sup>, Claire Richard<sup>1</sup>, Lisa Redin<sup>2</sup>, Mirva Niinipuu<sup>2</sup>, Stina Jansson<sup>2</sup>, Farouk Jaber<sup>3</sup>, Mohamad Sleiman<sup>1\*</sup>

<sup>1</sup> Université Clermont Auvergne, CNRS, SIGMA Clermont, Institut de Chimie de Clermont-Ferrand, F-63000 Clermont–Ferrand, France.

<sup>2</sup> Umeå University, Department of Chemistry, SE-90187 Umeå, Sweden.

<sup>3</sup> Laboratory of Analysis of Organic Compounds (509), Faculty of Sciences I, Lebanese University, Hadath, Beirut, Lebanon.

\*Corresponding author: M Sleiman

Email: mohamad.sleiman@sigma-clermont.fr

Tel: +33 (0)4 73 40 76 35

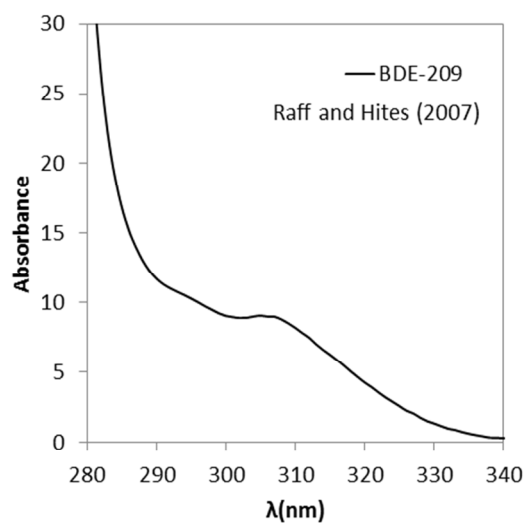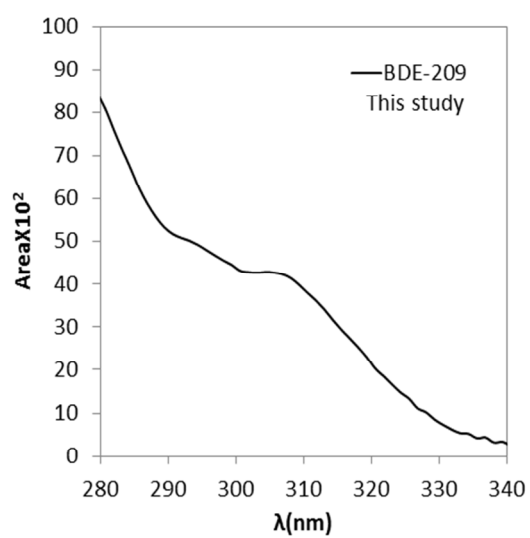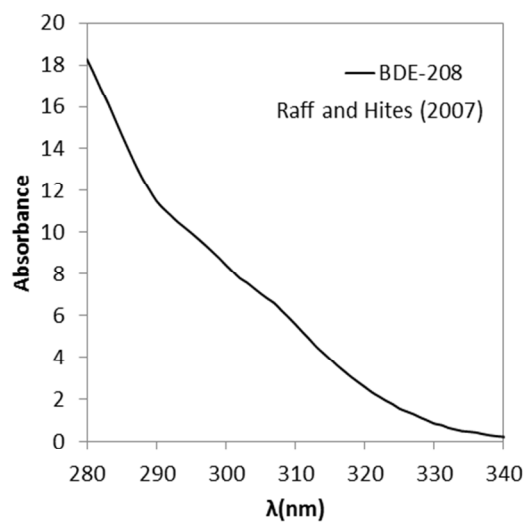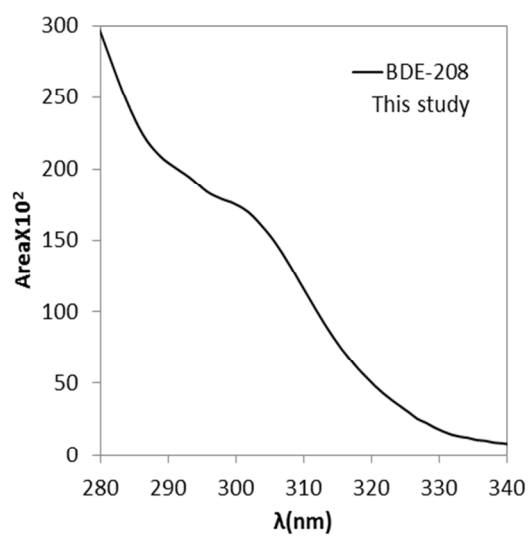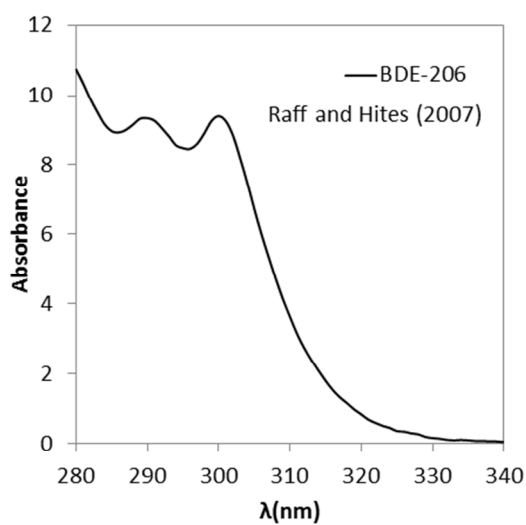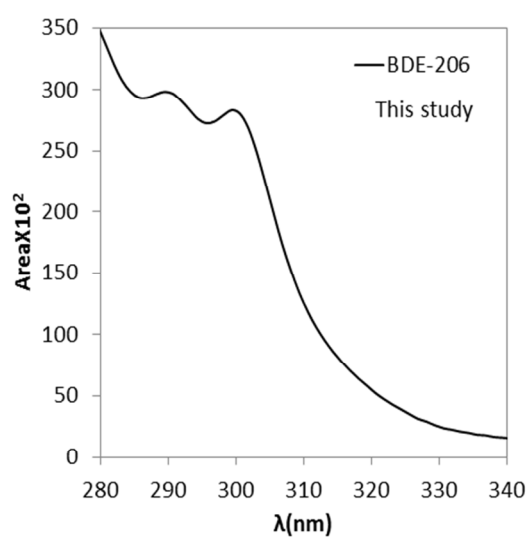

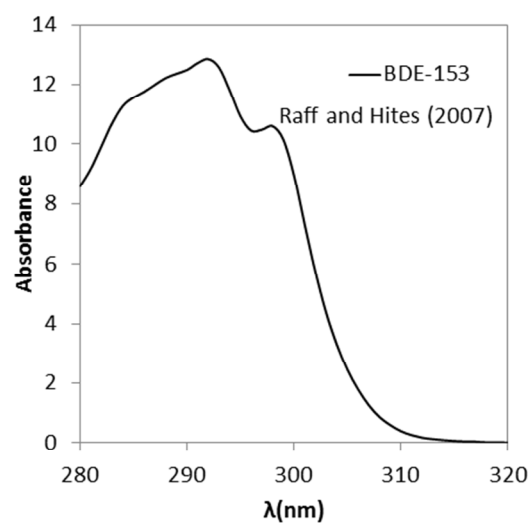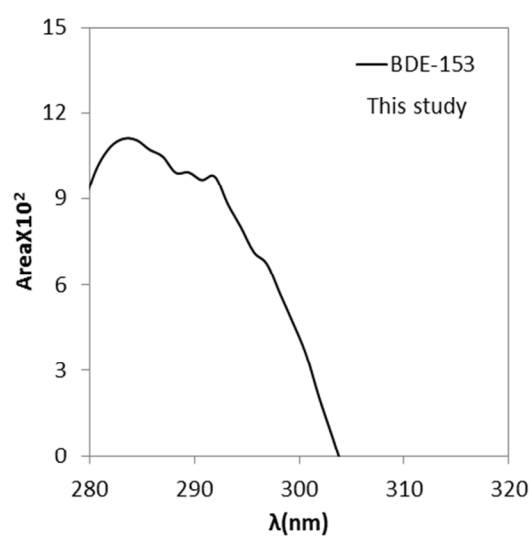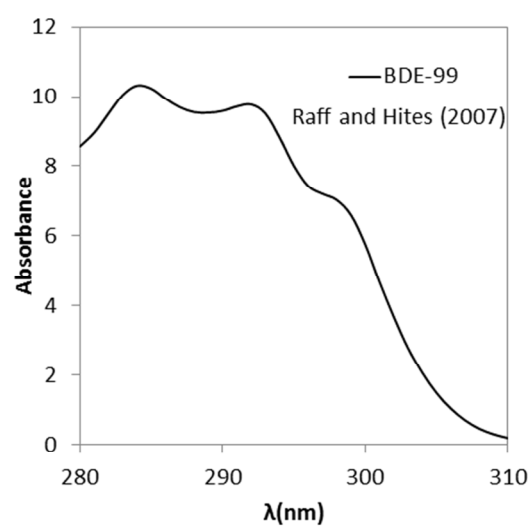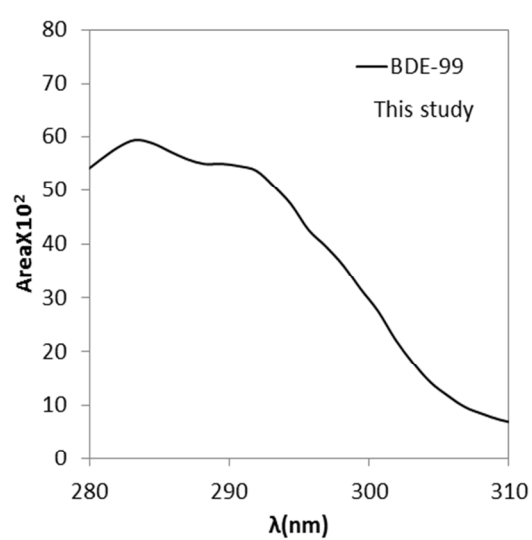

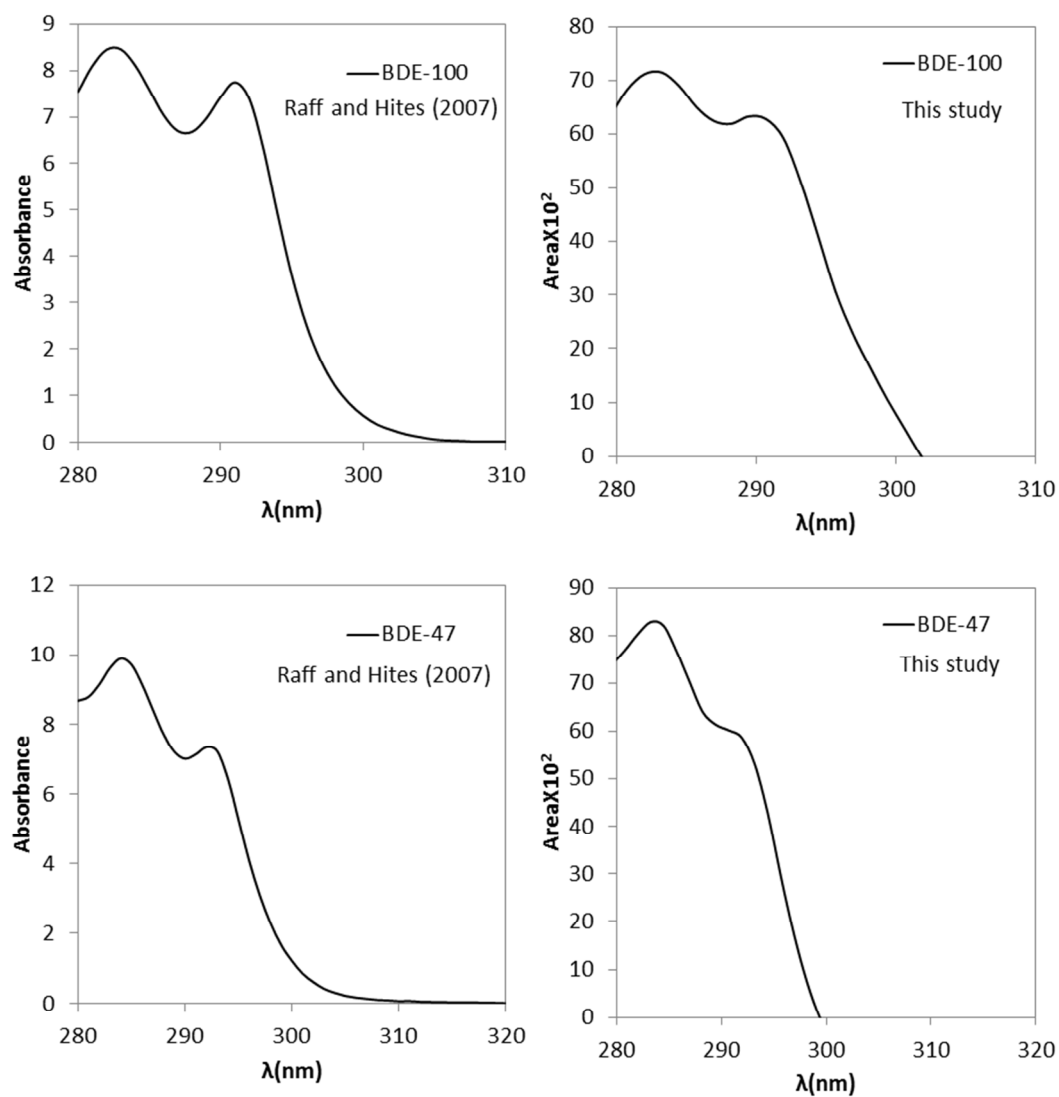

Figure S1. Comparison of UV spectra of PBDEs detected by HPLC-DAC in our study and those reported by Raff and Hites.<sup>1</sup>

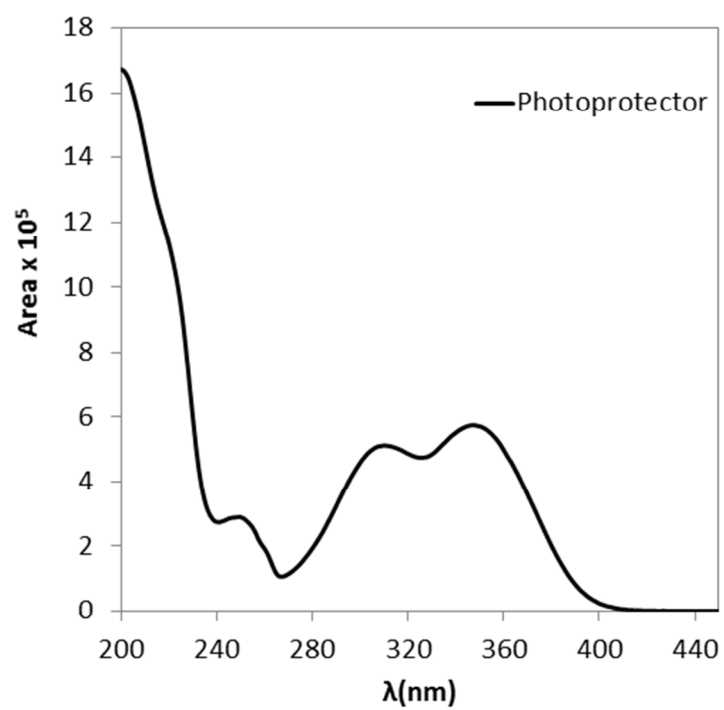

Figure S2. UV spectrum of a benzotriazole UV absorber detected in ELV fabric sample S1.

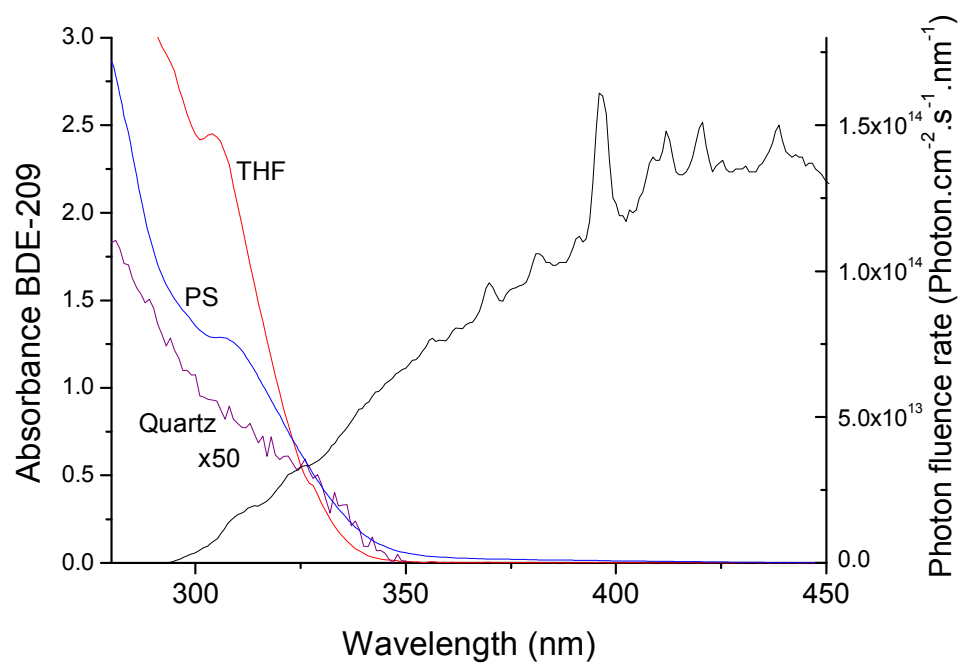

Figure S3. Comparison of Suntest Xenon lamp UV-visible emission spectrum and UV-visible absorption spectrum of BDE-209 at 9600 µg/mL in tetrahydrofuran, in PS (2.5% wt) and as a pure deposit on Quartz.

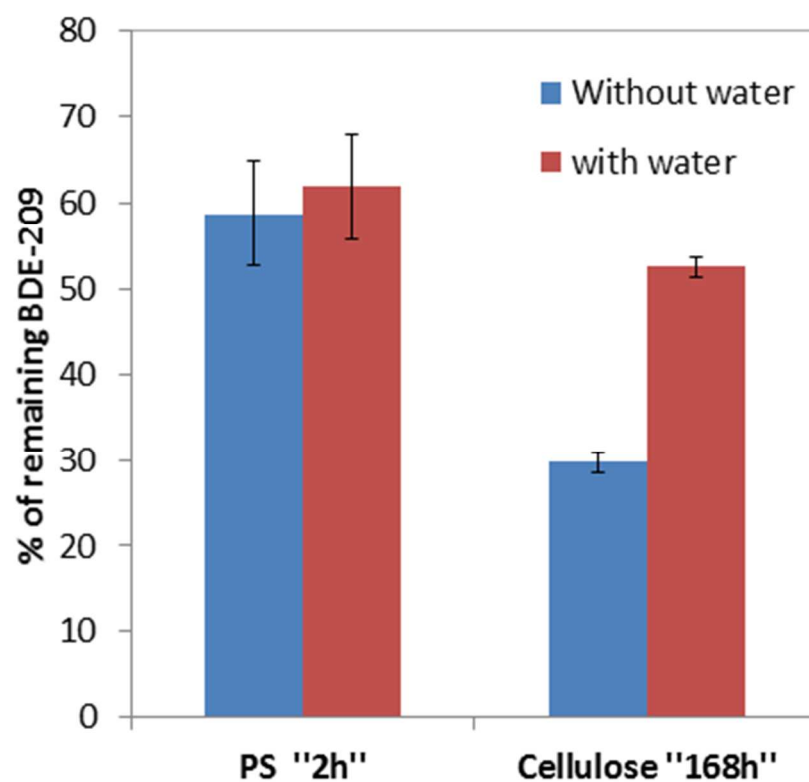

Figure S4. Effect of hydration on the photodegradation rate of BDE-209 impregnated at 2.5% in weight in cellulose and polystyrene films of 200  $\mu\text{m}$  thickness and irradiated in a simulated sunlight exposure chamber (Suntest XPS, Atlas) at  $550 \text{ W m}^{-2}$ .

Table S1. Levels of BDE-209 and individual PBDEs ( $\mu\text{g g}^{-1}$ ) in car seat fabrics and in polyurethane foam collected from ELVs.

| ELV                      | BDE-209 | BDE-208 | BDE-206 | BDE-196 | BDE-197 | BDE-183 | BDE-154 | BDE-153 | BDE-99 | BDE-100 | BDE-47 |
|--------------------------|---------|---------|---------|---------|---------|---------|---------|---------|--------|---------|--------|
| <b>FABRIC</b>            |         |         |         |         |         |         |         |         |        |         |        |
| <b>S1</b>                | 119571  | 125     | 7943    | nd      | 3       | 5       | nd      | nd      | nd     | nd      | nd     |
| <b>S2</b>                | nd      | nd      | 13      | 39      | nd      | 90      | nd      | nd      | nd     | nd      | nd     |
| <b>S3</b>                | 1603    | 34      | 16      | nd      | 122     | 269     | nd      | nd      | nd     | nd      | nd     |
| <b>S4</b>                | 549     | 46      | 10      | nd      | nd      | 11      | 14      | 114     | 71     | nd      | 10     |
| <b>S5</b>                | 48      | 232     | nd      | 416     | 270     | nd      | nd      | nd      | nd     | nd      | nd     |
| <b>S6</b>                | 8       | 205     | nd      | nd      | 144     | nd      | 36      | 190     | 23     | nd      | 9      |
| <b>S7</b>                | 221     | 434     | 27      | 51      | 110     | nd      | nd      | nd      | nd     | nd      | nd     |
| <b>S8</b>                | 218     | 171     | 2       | 3       | 262     | 205     | nd      | nd      | nd     | nd      | nd     |
| <b>S9</b>                | 145     | 256     | nd      | nd      | 165     | 69      | nd      | nd      | nd     | nd      | nd     |
| <b>POLYURETHANE FOAM</b> |         |         |         |         |         |         |         |         |        |         |        |
| <b>S3</b>                | 5864    | 63      | 382     | 27      | 267     | 33      | nd      | nd      | nd     | nd      | nd     |
| <b>S4</b>                | 724     | 14      | 17      | nd      | 60      | 436     | 279     | 867     | 2870   | 717     | 2606   |
| <b>S5</b>                | 99      | 21      | 9       | nd      | nd      | 278     | 2       | 21      | 21     | nd      | 40     |
| <b>S6</b>                | nd      | 19      | 5       | nd      | 7       | 147     | 123     | 455     | 1090   | 363     | 1006   |
| <b>S7</b>                | 98      | 20      | 95      | nd      | 61      | 147     | nd      | nd      | 68     | nd      | 21     |
| <b>S8</b>                | 349     | nd      | 16      | 16      | 52      | 158     | 8       | 32      | 36     | nd      | 15     |
| <b>S9</b>                | 20      | nd      | 87      | nd      | 49      | 90      | 8       | 15      | 350    | 49      | 101    |

## References

1. Raff, J.D.; Hites, R.A., Deposition versus photochemical removal of PBDEs from lake superior air. *Environ Sci Technol* **2007**, 41, 6725-6731.
